# Supplementary material for: New organoruthenium complexes with bioactive thiosemicarbazones as co-ligands: potential anti-trypanosomal agents
Source: Royal Society of Chemistry journal article supplement (doi:10.1039/c1dt11519g), 2011-12-03
Supplement: c1dt11519g.pdf [file c1dt11519g.pdf]

# New organoruthenium complexes with bioactive thiosemicarbazones as co-ligands: potential anti-trypanosomal agents

*Bruno Demoro,<sup>a</sup> Cynthia Sarniguet,<sup>a</sup> Roberto Sánchez-Delgado,<sup>b</sup> Miriam Rossi,<sup>c</sup> Daniel Liebowitz,<sup>c</sup> Francesco Caruso,<sup>d</sup> Claudio Olea-Azar,<sup>e</sup> Virtudes Moreno,<sup>e</sup> Andrea Medeiros,<sup>f,g</sup> Marcelo A. Comini,<sup>g</sup> Lucía Otero,<sup>a\*</sup> Dinorah Gambino<sup>a\*</sup>*

**Table 1S.** ESI-MS results for the  $[\text{Ru}_2(p\text{-cymene})_2(\text{L})_2]\text{X}_2$  complexes.

|              | positive mode                                                                | <i>m/z</i>   | negative mode   | <i>m/z</i> |
|--------------|------------------------------------------------------------------------------|--------------|-----------------|------------|
| <b>Ru-L1</b> | $[\text{Ru}_2\text{C}_{32}\text{H}_{38}\text{N}_8\text{O}_6\text{S}_2]^{2+}$ | 449.1 (100%) |                 |            |
| <b>Ru-L2</b> | $[\text{Ru}_2\text{C}_{34}\text{H}_{42}\text{N}_8\text{O}_6\text{S}_2]^{2+}$ | 463.1 (100%) | $\text{PF}_6^-$ | 144.8      |
| <b>Ru-L3</b> | $[\text{Ru}_2\text{C}_{36}\text{H}_{46}\text{N}_8\text{O}_6\text{S}_2]^{2+}$ | 477.1 (100%) | $\text{PF}_6^-$ | 144.8      |
| <b>Ru-L4</b> | $[\text{Ru}_2\text{C}_{44}\text{H}_{46}\text{N}_8\text{O}_6\text{S}_2]^{2+}$ | 525.2 (100%) |                 |            |

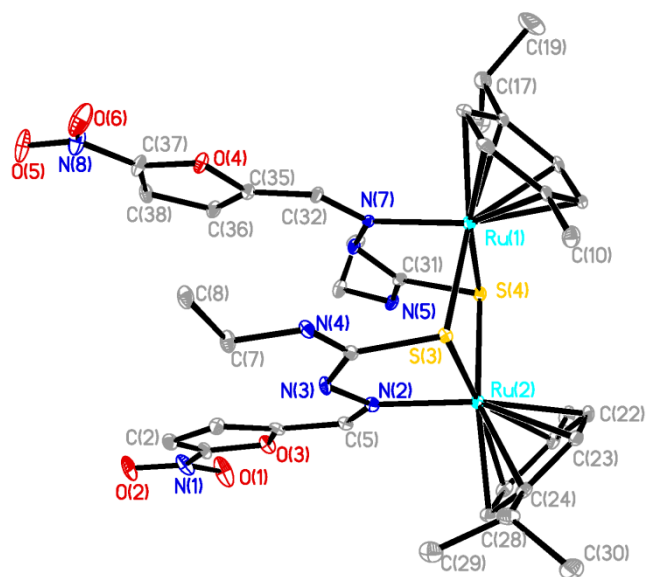

**Figure S1.** The cationic  $[\text{Ru}_2(p\text{-cymene})_2(\text{L}3)_2]^{2+}$  complex in  $[\text{Ru}_2(p\text{-cymene})_2(\text{L}3)_2](\text{PF}_6)_2$  showing ellipsoids; H atoms, the water molecule and the hexafluorophosphate are omitted.
